# Supplementary material
Source: publisher site journal article supplement (http://kjim.org/upload/media/kjim-2020-020-suppl4.pdf)
Supplement: Supplementary file 1 [file kjim-2020-020-suppl4.pdf]

**Supplementary Table 4. Performance of DNN model compared with FIT at points of low sensitivity of detecting advanced neoplasia**

| Screening strategy              | Sensitivity,<br>% | Specificity,<br>% | No. of<br>colonoscopy | ACRNs<br>detected, n | NNScope,<br>n | p value   |
|---------------------------------|-------------------|-------------------|-----------------------|----------------------|---------------|-----------|
| Target sensitivity              | 27.3              |                   |                       |                      |               |           |
| DNN                             | 27.3              | 90.5              | 266                   | 9                    | 29.6          | Reference |
| FIT                             | 27.3              | 97.4              | 79                    | 9                    | 8.8           | < 0.001   |
| Target sensitivity              | 42.4              |                   |                       |                      |               |           |
| DNN                             | 39.4              | 81.0              | 529                   | 13                   | 40.7          | Reference |
| Combined FIT and clinical score | 42.4              | 90.7              | 267                   | 14                   | 19.1          | < 0.001   |

DNN, deep neural network; FIT, fecal immunochemical test; ACRN, advanced colorectal neoplasia; NNScope, number needed to colonoscopy to detect one advanced colorectal neoplasia.
